# Supplementary material for: Strategies to Reduce Cesarean Deliveries: Surveying Polish Midwives and Midwifery Students on External Cephalic Version Practices
Source: Research Square preprint supplement (doi:10.21203/rs.3.rs-5792328/v1), 2025-04-09
Supplement: Supplementary file 1 [file b4b2301a420649844e883fce.docx]

**Appendix 1**

**Questionnaire addressed to midwives (answers to questions 14-21 considered as a correct one indicated in italics for the purpose of this analysis)**

1. What is your profession? (single-choice question)
   1. Master’s degree in midwifery
   2. Bachelor’s degree in midwifery
2. In which province do you work? (expandable list with the names of the Polish provinces)
3. What is your length of service? (single-choice question)
   1. Less than 5 years
   2. 5-20 years
   3. More than 20 years
4. What is your current work place? (multiple-choice question)
   1. Outpatient clinic
   2. Antenatal classes
   3. County hospital
   4. Provincial hospital
   5. Clinical hospital
5. What is the level of reference of the department you work in? (single-choice question)
   1. Ist level of reference
   2. IInd level of recerence
   3. IIIrd level of reference
   4. Not applicable
6. Do you have experience in managing pregnancies in your practice? (single-choice question)
   1. Yes
   2. No
7. What is your management of choice in a primiparous, term pregnancy with a non-cephalic fetal presentation? (single-choice question)
   1. Elective cesarean section
   2. External cephalic version
8. What is your management of choice of the respondents in a multiparous, term pregnancy with a non-cephalic fetal presentation? (single-choice question)
   1. Elective cesarean section
   2. External cephalic version
   3. Vaginal delivery in case of breech presentation
9. Do you know facilities performing external cephalic version? (single-choice question)
   1. Yes
   2. No
10. Do you work in facility, where external cephalic versions are perfomed? (single-choice question)
    1. Yes
    2. No
    3. Not applicable
11. Have you ever had personal contact with an external cephalic version procedure? (single-choice question)
    1. Yes
    2. No
12. Have you ever provided information about external cephalic version to the patient diagnosed with non-cephalic fetal presentation? (single-choice question)
    1. Yes
    2. No
13. What, in your opinion, might be the concerns of the medical staff in relation to the external cephalic version procedure? (Please answer each sub-point: 1-Strongly no, 2-Rather not, 3-I have no opinion, 4-Rather yes, 5-Decided yes)
    1. High risk of complications of ECV
    2. High risk of emergency cesarean section after ECV
    3. Pain during the procedure
    4. Low procedural efficacy of the procedure
    5. Distance of the centre performing the ECV from the patient's place of residence
14. What is the estimated effectiveness of external cephalic versions performed in primiparous women? (scored question, 1 point maximum)
    1. <20%
    2. *20%-40%*
    3. 40%-60%
    4. 60%-80%
15. What is the estimated effectiveness of external cephalic versions performed in multiparous women? (scored question, 1 point maximum)
    1. <20%
    2. 20%-40%
    3. *40%-60%*
    4. 60%-80%
16. What is the optimal time for performing the external cephalic version of the fetus? (scored question, 1 point maximum)
    1. at the earliest on the due date
    2. at 35 weeks' gestation
    3. *at 37 weeks' gestation*
17. What are the absolute contraindications for external cephalic version (multiple-choice, (scored question, 5 points for not selecting answers b, c, e, g, i):
    1. *Placenta previa*
    2. History of lower uterine segment cesarean section
    3. Oligohydramnios
    4. *History of classical cesarean section*
    5. Intrauterine fetal growth restriction
    6. *Placental abruption*
    7. Uterine defects
    8. *Lack of fetal well-being before the procedure*
    9. Estimated fetal weight >3500g
18. What is the estimated total percentage of external cephalic version complication? (scored question, 1 point maximum)
    1. *1-5%*
    2. 5-15%
    3. More than 15%
19. What is the estimated risk of emergency cesarean section in external cephalic version? (scored question, 1 point maximum)
    1. *<1 %*
    2. 1-10 %
    3. 10-15%
20. What is the estimated percentage of cases where the fetus returns to its previous position after a successful external cephalic version? (scored question, 1 point maximum)
    1. *1-5%*
    2. 5-15%
    3. More than 15%
21. What is the estimated percentage of vaginal births after successful external cephalic version? (scored question, 1 point maximum)
    1. *>70%*
    2. 30-70%
    3. 10-30%
22. Do you think that training on external cephalic version should be provided?
    1. Yes
    2. No
    3. I have no opinion
